# Supplementary material
Source: Springer Nature journal article supplement (https://www.springermedizin.de/resource/supplementary/10194_2014_632_MOESM2_ESM.pdf/9423334)
Supplement: MOESM2 [file 9423334]

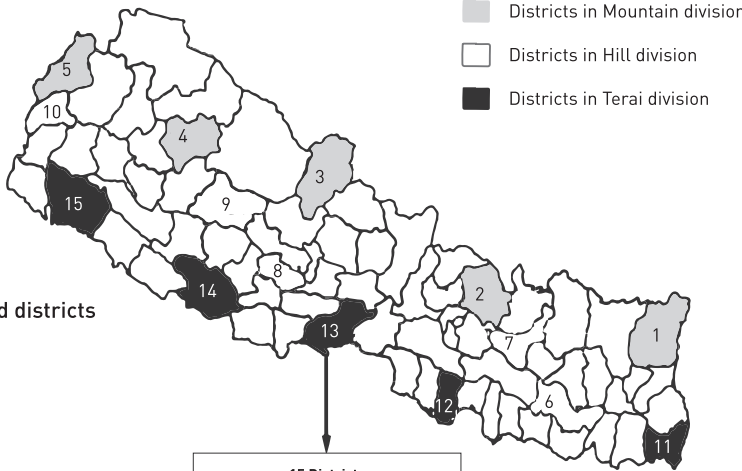

**Name of selected districts**

1. Taplejung
2. Sindhupalchok
3. Mustang
4. Jumla
5. Darchula
6. Udayapur
7. Ramechhap
8. Gulmi
9. Rukum
10. Baitadi

11. Jhapa
12. Rautahat
13. Nawalparasi
14. Dang
15. Kailali

**15 Districts**  
(Mountain n=5, Hill n=5 and Terai n=5)

**15 VDCs/ municipalities**  
(One from each selected district)

**15 wards (Clusters)**  
(One from each of 12 VDCs and 3 municipalities)
